# Supplementary material for: Pan-Arctic aerosol number size distributions: seasonality and transport patterns
Source: Copernicus journal article supplement (doi:10.5194/acp-17-8101-2017), 2017-07-04
Supplement: Supplementary file 1 [file acp-17-8101-2017-supplement.zip]

Archive with 2 entries (2 files):
- acp-17-8101-2017-supplement-title-page.pdf
- Fitting_Parameters_All_Percentiles_Review1.xlsx
