# Supplementary material for: Pan-Arctic aerosol number size distributions: seasonality and transport patterns
Source: Copernicus journal article supplement (doi:10.5194/acp-17-8101-2017), 2017-07-04
Supplement: Supplementary file 1 [file acp-17-8101-2017-supplement.zip › acp-17-8101-2017-supplement-title-page.pdf]

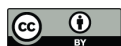

*Supplement of*

## **Pan-Arctic aerosol number size distributions: seasonality and transport patterns**

**Eyal Freud et al.**

*Correspondence to:* Eyal Freud ([eyal.freud@aces.su.se](mailto:eyal.freud@aces.su.se))

- [acp-17-8101-2017-supplement-title-page.pdf](#)
- [Fitting\\_Parameters\\_All\\_Percentiles\\_Review1.xlsx](#)

The copyright of individual parts of the supplement might differ from the CC BY 3.0 License.
