# Supplementary material for: Pan-Arctic aerosol number size distributions: seasonality and transport patterns
Source: Copernicus journal article supplement (doi:10.5194/acp-17-8101-2017), 2017-07-04
Supplement: Supplementary file 1 [file acp-17-8101-2017-supplement.zip › Fitting_Parameters_All_Percentiles_Review1.xlsx]

## Sheet: Alert
ALERT		Mode 1				Mode 2				Mode 3				Relative Error [%]
(P10)		N	log sg	Dg		N	log sg	Dg		N	log sg	Dg
Jan		1.09696	0.110005	30		16.0893	0.243038	74.0026		31.1258	0.16477	173.819		0.0549045
Feb		1	0.114131	30		20.5525	0.243038	75.8817		31.0696	0.154684	169.119		0.112693
Mar		1.39609	0.100243	30		25.618	0.234496	69.2181		51.7284	0.174509	165.406		0.0354287
Apr		1	0.129278	30		32.155	0.236121	79.7136		76.5109	0.163138	176.624		0.0402631
May		1.19463	0.105224	29.0956		1.00001	0.0866646	40.0681		44.4838	0.196759	134.453		0.104669
Jun		4.39488	0.133578	29.8468		1.63138	0.144123	60.4326		8.91348	0.185975	106.205		0.0771278
Jul		1	0.243038	30		9.04304	0.14528	40.3912		8.84011	0.171654	100		0.209994
Aug		6.74796	0.124731	29.3363		9.51559	0.229364	80		1.2585	0.0950716	136.906		0.0946877
Sep		3.63182	0.124915	27.5003		3.56053	0.178522	64.0956		3.3567	0.160899	138.182		0.0664646
Oct		1.82859	0.138157	30		1.93602	0.133754	56.1409		9.75321	0.165448	133.943		0.108229
Nov		1.19346	0.112054	30		8.94888	0.185742	53.3831		31.8117	0.181612	157.209		0.0560141
Dec		2.4604	0.117246	30		6.94601	0.158983	54.2759		24.1962	0.180738	143.635		0.0798105
ALERT		Mode 1				Mode 2				Mode 3				Relative Error [%]
(P25)		N	log sg	Dg		N	log sg	Dg		N	log sg	Dg
Jan		2.83859	0.127364	30		22.8269	0.220305	80		37.6971	0.150681	184.033		0.121002
Feb		2.5	0.138934	30		19.4036	0.202087	68.701		46.0385	0.160916	172.118		0.0893616
Mar		2.95791	0.11644	30		39.0474	0.243038	77.2839		59.5243	0.167295	178.958		0.0419149
Apr		2.5	0.115398	30		44.1009	0.238858	78.0795		89.7369	0.163328	178.166		0.0449067
May		2.5	0.121356	30		7.49198	0.183312	49.8562		60.9288	0.188784	144.907		0.0783622
Jun		12.0326	0.145482	30		2.81552	0.113549	50.3492		24.2648	0.197795	102.341		0.0632037
Jul		2.5	0.243038	30		23.6722	0.167024	42.6942		18.0334	0.184545	100		0.066161
Aug		19.79	0.165287	30		21.2597	0.241231	73.4098		5.63358	0.12429	125.678		0.0636318
Sep		2.50104	0.0876782	26.0471		10.9083	0.242981	40.4429		10.7806	0.172495	120.555		0.0556491
Oct		2.80211	0.148552	30		4.2577	0.157686	58.0466		14.4989	0.161855	141.01		0.0891849
Nov		2.5	0.134325	30		20.5523	0.226216	70.3803		38.6689	0.1756	173.256		0.0708293
Dec		2.5	0.130682	30		17.7017	0.225857	67.2231		31.132	0.175598	160.706		0.0696098
ALERT		Mode 1				Mode 2				Mode 3				Relative Error [%]
(P50)		N	log sg	Dg		N	log sg	Dg		N	log sg	Dg
Jan		5	0.153509	30		21.6968	0.199653	69.3296		62.0857	0.172284	179.097		0.0531101
Feb		5	0.149115	30		18.5109	0.176349	64.6964		71.1797	0.181052	172.692		0.0606205
Mar		6.73137	0.128302	30		43.8113	0.220405	75.6963		79.1355	0.169735	180.024		0.0375596
Apr		5	0.137078	30		50.2932	0.234572	70.2234		112.436	0.171601	174.491		0.0634078
May		5.48186	0.126215	30		37.679	0.243038	64.7768		72.1519	0.188359	157.878		0.0758887
Jun		33.8886	0.158049	30		7.98528	0.104135	47.0031		60.5807	0.207453	100.155		0.0364105
Jul		30.2544	0.180056	30		41.1074	0.132407	52.8811		38.0592	0.194945	107.185		0.0392714
Aug		17.5197	0.10306	26.4803		72.7859	0.243038	40		27.3854	0.164102	114.379		0.0590425
Sep		24.6086	0.195862	27.7974		14.062	0.243038	80		13.4792	0.152116	123.494		0.0960092
Oct		5	0.182964	30		5.00001	0.14774	52.514		24.739	0.181925	135.51		0.0732413
Nov		5	0.158331	30		19.7735	0.187225	62.6649		57.0325	0.179369	167.712		0.0470928
Dec		5	0.149338	30		30.6189	0.230327	80		48.224	0.170828	182.164		0.0762697
ALERT		Mode 1				Mode 2				Mode 3				Relative Error [%]
(P75)		N	log sg	Dg		N	log sg	Dg		N	log sg	Dg
Jan		7.5	0.243038	30		38.9425	0.234102	72.0085		80.5569	0.168626	188.458		0.0916826
Feb		7.5	0.147727	30		19.8868	0.160886	62.5915		96.1453	0.188489	173.039		0.0442096
Mar		13.8587	0.144402	30		54.9568	0.22796	80		97.8101	0.180881	180.315		0.0391521
Apr		15.943	0.166514	30		74.4056	0.243038	76.709		125.514	0.172596	177.294		0.0697822
May		23.4801	0.136433	30		81.1386	0.243038	68.3384		83.4524	0.170749	174.996		0.0943712
Jun		87.8328	0.243038	30		33.7888	0.129913	41.4432		96.3203	0.209875	113.628		0.0549771
Jul		97.3789	0.169127	30		50.4308	0.122073	55.4514		82.41	0.204095	108.005		0.0602035
Aug		148.276	0.214894	27.6515		58.9153	0.174006	40		56.179	0.178431	112.855		0.0659327
Sep		52.3829	0.188809	27.6903		25.8786	0.243038	80		21.9882	0.154315	122.633		0.0976544
Oct		7.5	0.184797	30		7.5	0.14636	49.2141		40.7205	0.208559	128.52		0.0529227
Nov		7.5	0.147125	30		27.1164	0.180981	62.5432		74.7463	0.184	170.137		0.0526834
Dec		7.5	0.160422	30		41.0871	0.22332	80		72.8204	0.16956	186.899		0.0639769
ALERT		Mode 1				Mode 2				Mode 3				Relative Error [%]
(P90)		N	log sg	Dg		N	log sg	Dg		N	log sg	Dg
Jan		9	0.182177	30		37.7696	0.193203	63.9949		115.324	0.183982	179.64		0.0586247
Feb		9.19606	0.143019	30		32.0832	0.184552	68.517		112.767	0.183681	180.49		0.0578083
Mar		22.4169	0.150184	30		50.0884	0.178216	71.1276		136.424	0.183513	172.877		0.0321511
Apr		46.5357	0.191438	29.8331		112.864	0.241745	80		129.265	0.167477	184.427		0.0637669
May		54.8042	0.175109	30		114.625	0.243038	57.326		127.266	0.166741	179.733		0.102883
Jun		102.405	0.139243	22.711		169.434	0.176582	40		122.254	0.211355	118.154		0.0408799
Jul		81.962	0.126028	26.295		283.753	0.222794	40		97.4785	0.197157	130.339		0.120922
Aug		267.83	0.152685	24.3598		94.3614	0.140193	44.041		121.99	0.261075	100.755		0.0319604
Sep		91.6843	0.160561	22.941		25.1045	0.131436	47.6822		66.3907	0.183168	114.825		0.058374
Oct		10.3023	0.243038	20		16.5113	0.138548	43.5048		63.4312	0.231144	133.322		0.0967486
Nov		12.0006	0.17781	30		67.6812	0.243038	77.9575		76.389	0.169498	192.374		0.0380927
Dec		9	0.174548	30		54.102	0.243038	79.3244		92.1708	0.173567	182.49		0.0393568

## Sheet: Barrow
BARROW		Mode 1				Mode 2				Mode 3				Relative Error [%]
(P10)		N	log sg	Dg		N	log sg	Dg		N	log sg	Dg
Jan		1.62074	0.130248	30		3.78328	0.117244	44.9496		75.1759	0.225841	147.826		0.0319517
Feb		1.61265	0.101748	30		2.66959	0.0825008	43.4606		116.149	0.223038	149.862		0.0650206
Mar		1.56998	0.115473	30		3.13243	0.0905095	45.677		133.78	0.225547	145.571		0.0538501
Apr		1.50055	0.0995859	30		2.91243	0.0943529	47.3991		112.672	0.203344	152.103		0.0488348
May		1	0.103359	30		1.17808	0.0730361	43.9472		81.2289	0.19254	136.104		0.205252
Jun		1.71766	0.0880448	30		1	0.128309	40		22.2152	0.212531	113.282		0.084055
Jul		7.59546	0.144252	30		3.67598	0.089503	40		24.416	0.214813	100		0.149839
Aug		6.14697	0.111458	27.186		7.8232	0.131119	56.7819		14.4598	0.172407	123.636		0.142581
Sep		2.9212	0.147268	28.0304		1	0.151206	80		16.7461	0.204991	124.037		0.175404
Oct		2.13762	0.129353	27.109		1	0.196468	80		27.1144	0.23927	129.226		0.095598
Nov		2.30745	0.11953	28.963		1.00037	0.087773	46.7486		55.606	0.19254	154.015		0.120741
Dec		1.53174	0.100164	30		3.34014	0.0909473	46.3779		106.094	0.207537	167.426		0.0649932
BARROW		Mode 1				Mode 2				Mode 3				Relative Error [%]
(P25)		N	log sg	Dg		N	log sg	Dg		N	log sg	Dg
Jan		3.16254	0.122726	30		6.26532	0.112992	49.1216		105.509	0.228805	151.963		0.0475251
Feb		2.83707	0.116103	28.8043		2.50002	0.0736404	44.3862		160.68	0.237562	143.574		0.0652483
Mar		4.60818	0.155665	29.997		6.25453	0.120478	47.3728		173.033	0.226871	149.875		0.019347
Apr		2.5	0.243038	30		6.28785	0.148456	44.5241		158.606	0.208176	156.166		0.0347761
May		2.5	0.12494	30		2.5	0.243038	80		161.571	0.209466	146.403		0.162964
Jun		5.23978	0.10614	29.0618		2.5	0.0743763	40		54.728	0.208241	107.941		0.159835
Jul		3.63306	0.0887775	23.3529		35.0906	0.154533	42.9945		50.1848	0.218862	100		0.0797277
Aug		25.412	0.111935	30		11.4619	0.243038	80		39.1914	0.214891	100		0.203229
Sep		4.96793	0.128745	28.2742		2.87789	0.128748	80		31.4064	0.213648	116.658		0.129601
Oct		3.79226	0.139451	27.6141		2.5	0.169864	80		39.6288	0.233748	130.603		0.161301
Nov		6.09636	0.155707	30		2.5	0.243038	80		82.0336	0.207255	151.033		0.102178
Dec		3.36417	0.116726	30		4.18005	0.0944183	48.1663		143.574	0.222028	159.719		0.043202
BARROW		Mode 1				Mode 2				Mode 3				Relative Error [%]
(P50)		N	log sg	Dg		N	log sg	Dg		N	log sg	Dg
Jan		8.50691	0.165058	30		9.73346	0.108984	48.7257		169.029	0.230521	152.442		0.0291734
Feb		13.0254	0.180993	29.8522		6.22032	0.118969	49.0485		215.853	0.248215	142.972		0.021582
Mar		19.4216	0.176943	30		7.47748	0.10955	49.4414		214.691	0.230104	149.017		0.030765
Apr		7.94358	0.142127	29.3471		6.46711	0.0897216	46.5735		221.094	0.212026	152.685		0.0295855
May		5	0.119108	30		5.60847	0.074705	42.5872		266.19	0.20346	150.816		0.0996725
Jun		17.4182	0.153639	26.2228		16.0544	0.106273	41.3072		91.3917	0.206539	113.58		0.0845472
Jul		46.4027	0.141984	28.8003		53.775	0.135525	53.392		107.679	0.232241	100		0.073858
Aug		59.7081	0.153594	29.3611		24.5705	0.0733219	40.3462		87.5514	0.244588	100		0.123021
Sep		12.2736	0.150244	29.691		5.81861	0.125646	80		64.1715	0.197108	112.731		0.168513
Oct		6.91196	0.138432	27.7907		5	0.165021	80		57.9742	0.232828	133.226		0.145274
Nov		13.7775	0.183202	29.5921		5	0.243038	80		122.544	0.221176	156.119		0.0917801
Dec		7.65132	0.139209	28.1343		5.0047	0.0963354	44.5789		198.044	0.243031	157.289		0.0249751
BARROW		Mode 1				Mode 2				Mode 3				Relative Error [%]
(P75)		N	log sg	Dg		N	log sg	Dg		N	log sg	Dg
Jan		33.9387	0.221526	30		9.55698	0.116305	54.2167		267.314	0.243517	145.946		0.0359123
Feb		35.8613	0.188705	26.9624		22.3075	0.142459	46.2329		270.169	0.246951	143.716		0.028644
Mar		50.1199	0.190007	27.1188		17.44	0.120723	47.2652		265.907	0.236354	146.539		0.0281394
Apr		31.5452	0.190181	27.3276		14.5153	0.113128	50.215		289.914	0.212785	155.712		0.0377874
May		19.1406	0.155658	30		10.851	0.0949772	50.0566		318.277	0.213745	148.025		0.0419605
Jun		93.9748	0.16456	27.3412		38.5734	0.126871	51.3852		138.395	0.214263	118.857		0.0918652
Jul		142.017	0.243038	21.6617		166.68	0.172218	46.4271		160.526	0.227119	113.796		0.0525117
Aug		105.906	0.130054	20		119.073	0.113567	40		124.342	0.25005	101.535		0.185413
Sep		26.3666	0.162027	24.0158		9.10253	0.082459	40		121.325	0.192662	111.596		0.187754
Oct		13.9429	0.142893	28.0309		7.5	0.185468	80		84.6104	0.236025	136.844		0.127549
Nov		29.2263	0.191513	30		24.897	0.243038	48.0744		166.712	0.224491	160.181		0.0510089
Dec		31.0519	0.191402	28.7101		11.0524	0.115622	52.3525		257.949	0.245079	154.765		0.0375758
BARROW		Mode 1				Mode 2				Mode 3				Relative Error [%]
(P90)		N	log sg	Dg		N	log sg	Dg		N	log sg	Dg
Jan		136.911	0.146122	23.9706		9	0.0571915	45.8906		416.629	0.257743	130.07		0.0495068
Feb		96.1917	0.192475	25.3521		36.8495	0.119556	45.6917		353.932	0.253344	140.022		0.0397806
Mar		101.438	0.202323	22.2937		64.5765	0.163595	43.6157		319.33	0.238226	144.282		0.049927
Apr		107.26	0.140219	21.9963		70.0843	0.130631	43.1306		376.701	0.228897	158.916		0.0205658
May		43.474	0.243038	20		50.9353	0.185156	49.3212		366.934	0.210918	154.509		0.0209514
Jun		422.482	0.243038	20		180.01	0.152099	46.7696		178.854	0.222579	129.533		0.116151
Jul		210.235	0.120335	21.6831		324.193	0.134031	48.0133		291.438	0.265882	100		0.0713735
Aug		617.906	0.141129	21.1165		97.9384	0.0935846	47.1604		164.42	0.257793	100.373		0.0965654
Sep		57.4248	0.16919	21.1646		21.0333	0.0858371	40		188.403	0.210306	117.66		0.211275
Oct		33.5077	0.176138	26.7169		9	0.243038	80		118.806	0.225429	140.929		0.100902
Nov		36.9229	0.149185	20.6059		81.6799	0.198624	40		230.049	0.248341	148.477		0.0443054
Dec		61.2358	0.187261	23.2837		17.5225	0.121504	40		371.093	0.261024	141.803		0.0517027

## Sheet: Nord
NORD		Mode 1				Mode 2				Mode 3				Relative Error [%]
(P10)		N	log sg	Dg		N	log sg	Dg		N	log sg	Dg
Jan		3.98318	0.123139	30		4.44226	0.110353	48.3484		34.4152	0.203981	140.921		0.13721
Feb		5.31343	0.175548	29.9999		12.8577	0.19253	53.6414		41.3667	0.190124	148.747		0.0518565
Mar		5.331	0.149542	30		20.2241	0.206555	80		35.0254	0.157811	185.739		0.247901
Apr		1.00001	0.0844721	21.4476		19.9324	0.168118	42.8368		125.292	0.197615	156.546		0.0356938
May		6.12781	0.11975	30		1.82044	0.0819347	44.408		55.1377	0.221927	133.826		0.0610259
Jun		1.07924	0.0955325	22.5612		3.62595	0.184338	49.0762		2.38713	0.174416	150.765		0.206588
Jul		8.08014	0.159109	30		4.16809	0.130377	40		7.55216	0.191411	100		0.0824694
Aug		13.8133	0.132402	30		3.32893	0.105011	59.1805		6.38351	0.170293	110.646		0.0772071
Sep		5.6381	0.138781	30		1.1024	0.109885	40		9.27385	0.204596	106.667		0.0935676
Oct		5.56389	0.187407	29.9982		2.14435	0.133399	54.3417		17.7817	0.175658	124.036		0.0755348
Nov		1.00112	0.243013	29.9925		14.8588	0.206952	40.2164		40.9348	0.195562	161.587		0.0544145
Dec		3.73541	0.144053	30		4.45337	0.136069	49.858		25.5879	0.191482	143.179		0.0727314
NORD		Mode 1				Mode 2				Mode 3				Relative Error [%]
(P25)		N	log sg	Dg		N	log sg	Dg		N	log sg	Dg
Jan		5.13452	0.155924	30		24.2203	0.243038	77.2172		36.0441	0.186542	173.636		0.0894029
Feb		9.15373	0.227083	30		17.7698	0.218676	56.1055		47.4749	0.181317	156.639		0.0895715
Mar		2.50018	0.115474	22.1673		26.0639	0.224309	51.0534		85.0953	0.200218	163.763		0.0280432
Apr		2.50016	0.153833	29.9999		30.6479	0.201484	44.7806		147.578	0.203895	157.294		0.0335341
May		8.77225	0.160624	30		8.14885	0.128259	40		75.8376	0.231905	133.497		0.0600515
Jun		7.30986	0.13392	24.7696		7.8677	0.172178	47.3522		17.3872	0.247833	100		0.0621773
Jul		24.9901	0.243038	30		8.51904	0.109243	40.456		16.9501	0.201805	100		0.0973987
Aug		36.7422	0.187439	30		5.24513	0.110751	40		15.4015	0.184379	100		0.0826541
Sep		19.5563	0.210156	28.7493		2.5	0.243038	80		14.3801	0.187558	116.044		0.102117
Oct		9.47249	0.178918	30		2.92652	0.132601	53.8893		25.8902	0.183182	123.134		0.0667041
Nov		6.85916	0.232664	29.9259		14.3428	0.199899	45.4044		56.3176	0.189108	163.358		0.0261073
Dec		4.98156	0.166551	26.0754		8.5504	0.168242	48.7475		39.1421	0.202276	150.382		0.0658422
NORD		Mode 1				Mode 2				Mode 3				Relative Error [%]
(P50)		N	log sg	Dg		N	log sg	Dg		N	log sg	Dg
Jan		16.0271	0.229448	30		15.7802	0.172365	59.8399		69.0279	0.205634	167.561		0.0794167
Feb		17.1609	0.194771	30		12.4208	0.151754	55.1288		77.9787	0.205714	157.969		0.0392306
Mar		20.3246	0.208291	30		29.6349	0.214814	66.4944		102.1	0.196001	167.217		0.048563
Apr		5.0005	0.243031	23.9573		47.6043	0.225929	45.3949		176.622	0.202714	161.938		0.0399649
May		5.89997	0.156906	30		35.433	0.205145	41.0599		99.1001	0.220119	144.798		0.0711372
Jun		39.5947	0.199751	27.6085		5.00007	0.104503	47.6404		49.821	0.236927	101.244		0.0726421
Jul		34.4557	0.243038	20		53.3066	0.177434	40.5775		43.1636	0.230523	100		0.0738024
Aug		89.765	0.243038	22.9463		20.787	0.113247	41.2814		31.2899	0.213121	100		0.0395792
Sep		42.7728	0.243038	24.7756		16.168	0.243038	80		18.6552	0.169491	127.464		0.0810577
Oct		13.2533	0.179387	26.6502		5.88061	0.122127	45.6944		38.3916	0.192451	123.824		0.109966
Nov		12.9673	0.231539	29.9994		23.3949	0.243029	61.291		65.9568	0.181731	171.174		0.03051
Dec		15.557	0.238258	29.6745		19.2861	0.243037	79.9999		50.8062	0.184898	175.01		0.0654689
NORD		Mode 1				Mode 2				Mode 3				Relative Error [%]
(P75)		N	log sg	Dg		N	log sg	Dg		N	log sg	Dg
Jan		29.3024	0.243036	28.8358		27.0234	0.201309	70.1918		104.587	0.2085	185.481		0.082997
Feb		25.9548	0.195421	28.5764		10.7645	0.120985	53.6177		118.074	0.219782	160.883		0.0560889
Mar		36.0646	0.194126	26.4788		52.6536	0.243036	77.9139		123.284	0.205486	181.407		0.0360926
Apr		7.50008	0.125413	21.042		74.7033	0.242919	50.0519		205.153	0.202181	168.416		0.0408741
May		18.1449	0.243038	20		94.5987	0.243038	42.7386		141.01	0.205296	168.824		0.0901977
Jun		64.0258	0.111045	22.5933		55.7798	0.128751	41.3046		83.6108	0.22691	108.411		0.0610497
Jul		136.295	0.243038	27.1153		16.8602	0.0825215	44.3776		106.262	0.241536	100		0.053291
Aug		214.874	0.243038	22.1737		20.8116	0.117653	46.0026		58.3148	0.197293	112.302		0.065488
Sep		95.0168	0.227898	20		18.3088	0.140693	41.8947		54.027	0.200068	118.406		0.0664065
Oct		23.5797	0.243027	20.0003		18.4055	0.166187	45.1901		53.9571	0.19706	136.877		0.066953
Nov		27.0317	0.232966	29.9994		23.2263	0.190432	66.0668		89.5728	0.19418	171.813		0.0286326
Dec		23.2992	0.243037	22.9918		31.7162	0.243036	67.565		80.2936	0.191578	181.768		0.0599701
NORD		Mode 1				Mode 2				Mode 3				Relative Error [%]
(P90)		N	log sg	Dg		N	log sg	Dg		N	log sg	Dg
Jan		22.0828	0.132084	22.0302		32.3266	0.159121	46.944		224.509	0.234786	169.416		0.0768965
Feb		38.5723	0.207565	27.6552		14.0853	0.110159	56.2164		204.814	0.208585	168.472		0.10942
Mar		74.9672	0.22149	27.892		15.3068	0.124315	67.269		189.173	0.216496	173.866		0.0627413
Apr		67.4407	0.194789	30		55.614	0.158889	67.1047		240.351	0.192982	176.582		0.0548691
May		165.487	0.243038	20		96.1613	0.232745	59.5987		181.134	0.182617	184.878		0.112252
Jun		478.363	0.24303	21.9434		9.00053	0.243029	79.9979		103.666	0.211919	121.768		0.102185
Jul		256.739	0.243038	20		65.5712	0.136751	46.6306		137.137	0.227881	110.383		0.106572
Aug		376.08	0.169683	20.8874		51.6147	0.10608	46.9384		113.434	0.239728	101.04		0.0820236
Sep		141.712	0.132191	20		49.0171	0.113963	40		95.1956	0.219924	107.863		0.117392
Oct		44.8999	0.243038	20		35.1447	0.190635	51.5694		74.9158	0.206287	153.254		0.0728465
Nov		34.2185	0.243038	22.3506		33.9954	0.190727	51.0567		129.695	0.228043	166.253		0.0579574
Dec		44.9609	0.243038	24.6361		38.7206	0.211767	72.9918		116.224	0.200582	190.114		0.0637035

## Sheet: Tiksi
TIKSI		Mode 1				Mode 2				Mode 3				Relative Error [%]
(P10)		N	log sg	Dg		N	log sg	Dg		N	log sg	Dg
Jan		5.92785	0.221811	30		32.6813	0.243038	72.1234		45.5875	0.188083	207.319		0.0571691
Feb		5.59178	0.135192	30		53.7322	0.243038	80		59.3569	0.186353	202.463		0.0805903
Mar		1.00002	0.168704	30		40.4017	0.231696	61.8246		77.3618	0.194807	173.425		0.0732197
Apr		7.13506	0.134521	30		31.9636	0.237491	80		79.8516	0.171258	178.746		0.0527001
May		2.06478	0.104746	30		1	0.123821	40		39.1945	0.237548	132.307		0.0716124
Jun		4.00458	0.114546	30		6.50921	0.167032	73.3908		14.3207	0.135788	134.483		0.10243
Jul		2.67432	0.0770726	30		13.0564	0.182566	40		12.2052	0.165009	118.639		0.154433
Aug		3.36474	0.111357	30		12.3324	0.198703	47.837		16.9587	0.139793	141.424		0.180822
Sep		5.89609	0.146496	28.6989		2.64079	0.168428	60.9285		9.78735	0.16024	143.649		0.114717
Oct		4.88193	0.175967	30		10.4365	0.243038	61.8937		17.2868	0.175636	168.638		0.128627
Nov		8.85014	0.160542	30		19.5403	0.196278	63.5716		39.9829	0.183344	178.484		0.0390104
Dec		4.74962	0.156041	30		32.0558	0.243038	66.8036		52.3527	0.18822	194.634		0.0510071
TIKSI		Mode 1				Mode 2				Mode 3				Relative Error [%]
(P25)		N	log sg	Dg		N	log sg	Dg		N	log sg	Dg
Jan		7.2958	0.197313	27.8989		56.4681	0.243038	80		51.1705	0.179445	213.367		0.0511887
Feb		6.7649	0.197775	30		62.3466	0.243038	70.1743		91.3494	0.210501	176.698		0.0570413
Mar		2.5	0.243038	20		47.4178	0.198121	51.6408		125.325	0.204111	163.015		0.0677738
Apr		11.1053	0.152759	30		51.6747	0.243038	76.1471		100.219	0.163911	180.214		0.0545862
May		2.5	0.115892	30		8.17843	0.176845	42.2977		52.2824	0.223201	140.056		0.0393081
Jun		13.0909	0.127697	30		19.5531	0.243038	80		32.3192	0.148009	128.38		0.236523
Jul		15.4752	0.201645	30		21.6193	0.131282	40		25.018	0.186257	111.472		0.168992
Aug		2.5	0.0926646	30		36.0505	0.203744	40.8198		30.2252	0.14927	143.954		0.103018
Sep		13.4828	0.243038	30		8.81008	0.143654	40		23.9343	0.182577	136.307		0.094555
Oct		8.71381	0.137984	30		29.1371	0.243038	57.8221		41.3032	0.170642	179.712		0.0614351
Nov		12.1048	0.173936	30		33.9044	0.243038	72.5632		45.6005	0.177851	193.298		0.0530302
Dec		8.27622	0.230828	30		33.8094	0.243038	62.2502		63.6115	0.193623	191.729		0.0294429
TIKSI		Mode 1				Mode 2				Mode 3				Relative Error [%]
(P50)		N	log sg	Dg		N	log sg	Dg		N	log sg	Dg
Jan		11.8566	0.243038	25.9723		77.378	0.243038	75.9724		73.8342	0.185106	205.843		0.0392826
Feb		15.0698	0.243038	20		65.6	0.208306	57.3053		130.621	0.218992	162.218		0.0309249
Mar		37.8009	0.243038	29.8272		92.3208	0.243038	78.4582		123.741	0.186663	179.672		0.0644823
Apr		21.839	0.171837	30		82.14	0.243038	64.7866		151.607	0.17939	170.115		0.0891934
May		15.0004	0.181467	30		35.2152	0.243038	79.4361		60.0861	0.186453	179.937		0.0508892
Jun		57.8449	0.137541	30		19.9774	0.0965842	45.3942		128.781	0.222162	100		0.0940661
Jul		67.0307	0.243038	30		42.3485	0.145818	40.6727		43.2014	0.184036	115.594		0.0724227
Aug		5	0.106833	30		106.678	0.228357	44.8831		59.0642	0.173512	152.794		0.0957533
Sep		31.3879	0.136064	30		51.8125	0.131303	50.272		64.0766	0.197489	152.272		0.0882083
Oct		10.6823	0.154968	30		75.092	0.243038	54.7576		62.4969	0.155191	190.202		0.0986565
Nov		23.5377	0.202616	30		48.2679	0.243038	77.0554		57.8892	0.180106	195.567		0.0570675
Dec		15.2389	0.181652	30		36.7492	0.172382	61.4468		81.4349	0.200598	186.379		0.0531659
TIKSI		Mode 1				Mode 2				Mode 3				Relative Error [%]
(P75)		N	log sg	Dg		N	log sg	Dg		N	log sg	Dg
Jan		32.5921	0.193591	30		91.0315	0.211091	80		94.3026	0.192298	202.683		0.0490954
Feb		31.5031	0.243038	20		122.018	0.234572	65.0503		132.063	0.206747	179.533		0.0381054
Mar		93.049	0.238067	27.8382		147.96	0.243038	80		167.947	0.181049	187.546		0.0483671
Apr		64.7009	0.178263	30		143.383	0.243038	63.8153		203.643	0.184128	170.105		0.0872652
May		38.1783	0.225946	29.0317		85.9027	0.243038	80		84.4932	0.158249	202.608		0.0788234
Jun		194.771	0.189515	30		216.938	0.154481	59.2662		141.619	0.19388	128.55		0.0399808
Jul		10.7467	0.0708707	30		391.469	0.227466	40.0227		35.205	0.118998	157.104		0.219794
Aug		162.805	0.2266	30		145.724	0.194044	60.5976		140.553	0.190013	164.095		0.0523049
Sep		7.50002	0.140136	30		215.241	0.23542	44.1618		117.233	0.203926	166.901		0.0704723
Oct		51.6341	0.185762	30		109.828	0.243038	62.6194		91.1648	0.163329	195.29		0.0896856
Nov		42.1026	0.243038	22.0485		76.5071	0.243038	62.4339		77.8065	0.193419	188.705		0.0697769
Dec		11.9716	0.116584	20		78.6731	0.206453	54.3552		103.228	0.213324	182.956		0.059515
TIKSI		Mode 1				Mode 2				Mode 3				Relative Error [%]
(P90)		N	log sg	Dg		N	log sg	Dg		N	log sg	Dg
Jan		101.985	0.170942	30		132.752	0.139416	61.9716		157.709	0.221572	173.12		0.0745357
Feb		49.9683	0.125748	21.2173		193.222	0.243038	65.1662		163.553	0.21914	174.228		0.0528944
Mar		209.022	0.224992	28.9816		171.951	0.162947	68.8298		277.555	0.182116	181.788		0.0729453
Apr		65.3913	0.110295	21.0166		328.054	0.22802	46.7564		290.327	0.186584	164.383		0.0489194
May		10.8313	0.243038	20		226.882	0.207135	43.7706		326.555	0.208297	168.445		0.0909444
Jun		582.225	0.243038	30		141.419	0.0970995	55.6465		481.705	0.253388	100		0.0823142
Jul		649.42	0.234894	30		298.32	0.129096	51.0611		115.361	0.208114	127.677		0.0566896
Aug		166.41	0.119268	20		274.379	0.159201	40		483.168	0.30103	118.477		0.111893
Sep		175.511	0.175116	30		275.038	0.243038	60.5114		172.586	0.230962	182.97		0.151737
Oct		95.913	0.243038	20		223.498	0.238918	51.895		178.912	0.205404	193.81		0.0907205
Nov		128.996	0.243038	29.5516		25.9328	0.127319	66.0801		129.956	0.211349	164.809		0.0462384
Dec		156.408	0.243037	22.4909		195.627	0.166792	45.698		124.629	0.211359	179.535		0.0805086

## Sheet: Zeppelin
ZEPPELIN		Mode 1				Mode 2				Mode 3				Relative Error [%]
(P10)		N	log sg	Dg		N	log sg	Dg		N	log sg	Dg
Jan		1.57865	0.114385	25.4762		1.00018	0.112651	46.0682		4.93289	0.242985	145.915		0.132633
Feb		1	0.243038	30		1	0.172234	55.3155		7.09363	0.208808	159.167		0.17747
Mar		2.91226	0.101166	29.2618		2.58621	0.117758	51.9041		16.2574	0.189155	158.292		0.179633
Apr		3.95216	0.124115	30		10.939	0.243038	68.5938		38.0335	0.163376	171.942		0.105623
May		1.00001	0.148642	30		13.7354	0.197681	44.0059		31.0514	0.186804	159.113		0.128858
Jun		6.22124	0.157126	24.9316		5.02923	0.123955	40.0019		15.6041	0.207994	109.573		0.0631325
Jul		9.83034	0.181686	30		3.59392	0.142606	40		13.0218	0.19994	100		0.163368
Aug		5.36011	0.113844	29.6719		9.55535	0.243038	40		3.07123	0.153516	117.988		0.113178
Sep		1.55356	0.104189	27.6218		5.8197	0.227269	40		1.95526	0.166408	119.4		0.108615
Oct		1.84192	0.243038	20		1.45804	0.162594	46.3422		3.57077	0.192331	120.573		0.207891
Nov		1.26075	0.102583	27.6988		1.45001	0.127415	48.8624		6.26801	0.197432	160.938		0.172044
Dec		1	0.102783	25.236		2.23295	0.23347	40.5408		5.53091	0.225695	154.802		0.185135
ZEPPELIN		Mode 1				Mode 2				Mode 3				Relative Error [%]
(P25)		N	log sg	Dg		N	log sg	Dg		N	log sg	Dg
Jan		4.50569	0.164992	29.6132		4.45476	0.207521	80		14.057	0.174876	196.722		0.0935821
Feb		2.50003	0.113247	28.1918		7.20156	0.24303	60.43		23.0396	0.159493	182.704		0.157412
Mar		5.61847	0.144255	30		12.5499	0.243038	80		38.6526	0.151384	188.288		0.116459
Apr		5.63117	0.135192	30		18.7951	0.243038	58.8506		58.5205	0.169681	175.802		0.0854057
May		10.0793	0.243038	20		25.7615	0.182325	43.6992		64.7573	0.197533	157.34		0.0892329
Jun		20.4699	0.188184	28.5269		10.0672	0.125913	40		38.1501	0.22032	114.892		0.056337
Jul		23.9646	0.224828	26.6436		16.7516	0.146458	40		37.4329	0.215647	108.962		0.0409182
Aug		7.46776	0.102617	30		34.746	0.2362	40		11.4814	0.16847	121.361		0.0933545
Sep		11.6472	0.153183	30		5.17946	0.149731	59.0462		8.36163	0.177368	123.736		0.0475667
Oct		4.16353	0.190865	28.4101		2.50006	0.16117	53.5847		10.9323	0.193184	137.801		0.105064
Nov		4.34998	0.165292	30		4.91711	0.186474	80		13.4272	0.171129	190.046		0.088715
Dec		5.22666	0.17777	28.1975		3.83828	0.175647	80		11.9134	0.173483	193.296		0.093373
ZEPPELIN		Mode 1				Mode 2				Mode 3				Relative Error [%]
(P50)		N	log sg	Dg		N	log sg	Dg		N	log sg	Dg
Jan		6.46601	0.137505	28.3554		13.4024	0.243038	80		36.3616	0.151957	212.602		0.207989
Feb		10.1433	0.152706	28.8907		19.129	0.243038	80		51.3763	0.142803	197.4		0.161203
Mar		9.56119	0.154353	28.2768		27.6218	0.243038	80		71.1001	0.149022	196.004		0.127595
Apr		20.0659	0.17916	30		38.8077	0.243038	73.8403		82.2117	0.170505	185.39		0.0699433
May		58.1784	0.243038	20		46.5779	0.171517	40.5619		106.844	0.209852	154.802		0.0886357
Jun		80.3776	0.225449	30		13.6641	0.103014	40		82.4486	0.214889	124.832		0.0373263
Jul		79.0858	0.184088	30		24.2466	0.109128	49.5946		84.4614	0.2284	110.607		0.0561851
Aug		74.8863	0.232206	30		23.1744	0.13891	40		45.4837	0.200778	114.358		0.0729771
Sep		15.8972	0.167952	22.1828		19.5459	0.160836	40.0002		31.3427	0.214664	109.883		0.0498657
Oct		8.34893	0.168095	29.121		5.00004	0.146875	53.7087		24.8698	0.195437	147.749		0.0724535
Nov		9.16758	0.179036	28.6398		8.95742	0.188589	80		29.1062	0.192741	188.413		0.0970158
Dec		7.53163	0.163726	26.9529		12.366	0.243038	80		27.1328	0.147886	211.45		0.153049
ZEPPELIN		Mode 1				Mode 2				Mode 3				Relative Error [%]
(P75)		N	log sg	Dg		N	log sg	Dg		N	log sg	Dg
Jan		15.3713	0.158646	27.8029		24.6877	0.243038	80		73.3573	0.149841	206.022		0.241174
Feb		24.8569	0.177158	30		37.2033	0.243038	80		108.343	0.147731	196.24		0.236145
Mar		21.0604	0.188192	30		50.1356	0.243038	80		133.728	0.151454	194.781		0.17902
Apr		68.1907	0.243038	30		62.9495	0.243038	80		119.695	0.180746	191.294		0.0965611
May		235.744	0.243038	20		68.4722	0.159961	48.0556		145.677	0.205831	157.364		0.0686356
Jun		138.721	0.153262	22.9271		128.601	0.148505	43.5329		150.277	0.212155	129.614		0.0621535
Jul		246.811	0.222935	24.5013		88.5883	0.143898	55.0663		131.9	0.218369	128.311		0.0535375
Aug		204.613	0.243038	28.3482		34.3728	0.121227	49.8369		95.7749	0.212972	123.207		0.0361246
Sep		49.7344	0.142558	26.2517		19.0104	0.105838	47.6045		70.5127	0.227332	108.941		0.0451137
Oct		17.1987	0.170128	30		15.7361	0.243038	71.5154		46.1641	0.208604	169.729		0.0953712
Nov		16.0758	0.189628	26.2304		19.2323	0.197003	80		51.2856	0.183664	198.467		0.146943
Dec		14.4451	0.165904	27.5868		21.1768	0.243038	80		65.3395	0.153	209.133		0.146587
ZEPPELIN		Mode 1				Mode 2				Mode 3				Relative Error [%]
(P90)		N	log sg	Dg		N	log sg	Dg		N	log sg	Dg
Jan		40.7135	0.175743	30		34.7733	0.243038	80		112.658	0.15983	198.468		0.218854
Feb		39.9477	0.181909	30		63.8177	0.243038	72.4868		180.081	0.155361	189.179		0.322414
Mar		37.7368	0.203083	30		74.6398	0.243038	75.133		230.337	0.161492	187.812		0.135553
Apr		122.776	0.243038	23.553		150.301	0.243038	75.2955		166.508	0.154669	215.627		0.156224
May		581.909	0.243038	20		93.4774	0.140018	52.202		209.424	0.226124	152.502		0.102623
Jun		384.78	0.143805	21.1788		329.039	0.160001	42.3654		225.98	0.222013	127.375		0.0339752
Jul		617.797	0.243038	20		163.704	0.155302	51.8796		237.402	0.254642	123.02		0.0553917
Aug		162.682	0.123666	20		295.054	0.171973	40.3197		202.357	0.264563	106.263		0.0861169
Sep		184.722	0.243038	27.8335		13.3789	0.109342	69.3594		112.949	0.234677	130.867		0.072234
Oct		29.6556	0.181872	29.892		48.8395	0.243038	80		64.7297	0.187022	203.368		0.193326
Nov		26.331	0.179423	25.1083		33.1767	0.195275	80		88.5335	0.179476	202.812		0.128093
Dec		30.7525	0.172611	30		18.499	0.146008	54.3614		166.229	0.193207	173.765		0.129405
